# Supplementary material
Source: PubMed Central journal article supplement (PMC3143610)

## **SUPPLEMENTARY METHODS**

*Western blotting-* Cells were exposed to MESP for the indicated time. Protein levels were assessed by the standard Western blotting. Antibodies phospho-STAT3 (Tyr705), STAT3, phospho-STAT1 (Ser727), STAT1, and phospho-p53 (Ser15) were from Cell Signaling Technology (Beverly, MA), antibody against p53 was from Santa Cruz Biotechnology (Santa Cruz, CA), and antibody against  $\beta$ -actin was from Sigma (St. Louis, MO).

## **SUPPLEMENTARY FIGURE LEGENDS**

Fig.S1. MESP did not affect STAT1 and p53. BEL-7402 cells were treated with MESP for 24 h. STAT3, STAT1, p53 and their phosphorylated forms were detected by Western blotting.

Figure S1

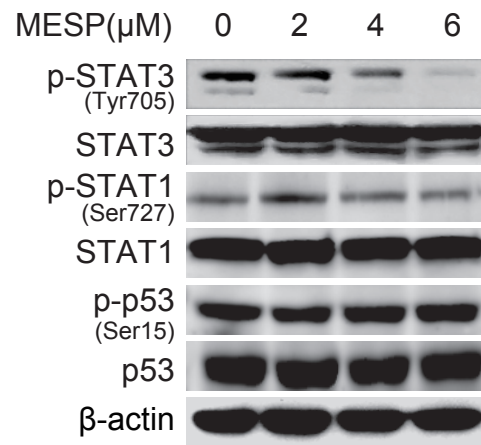

Supplement: supp_M111.232728_jbc.M111.232728-1.pdf [file supp_M111.232728_jbc.M111.232728-1.pdf]
